# Supplementary material for: The Effect of Single Recombination Events on Coalescent Tree Height and Shape
Source: PubMed Central journal article supplement (PMC3620475; doi:10.1371/journal.pone.0060123), 2013-04-08

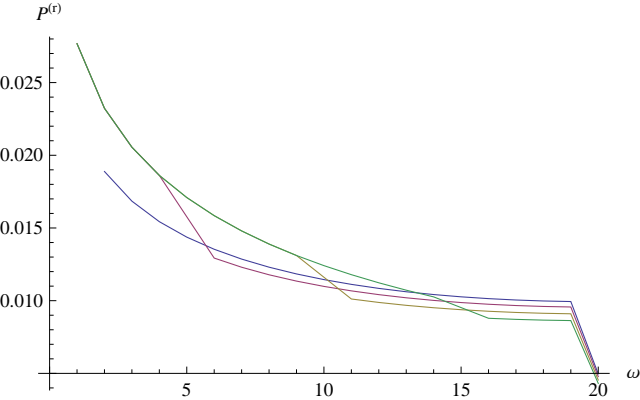

Supplement: pone.0060123.s005.pdf [file pone.0060123.s005.pdf]
